# Supplementary material for: Self-assembly of pseudorotaxane films with thermally reversible crystal phases and optical properties
Source: Royal Society of Chemistry journal article supplement (doi:10.1039/c3tc32344g), 2014-01-01
Supplement: c3tc32344g.pdf [file c3tc32344g.pdf]

# Self-assembly of Pseudorotaxane Films with Thermally Reversible Crystal Phases and Optical Properties

Yaching Tsai,<sup>a</sup> Kai-Jen Chen,<sup>a</sup> Chun-Jen Su,<sup>b</sup> Wei-Ru Wu,<sup>b</sup> U-Ser Jeng<sup>a,b</sup>  
and Masaki Horie\*<sup>a</sup>

<sup>a</sup> *Frontier Research Center on Fundamental and Applied Sciences of Matters, Department of Chemical Engineering, National Tsing-Hua University, 101, Sec. 2, Kuang-Fu Road, Hsin-Chu, 30013 Taiwan.*

<sup>b</sup> *National Synchrotron Radiation Research Center, 101, Hsin-Ann Rd. Science Park, Hsinchu, 30076, Taiwan*

## Supplementary Information

### Correspondence

Dr. Masaki Horie

E-mail: mhorie@mx.nthu.edu.tw

### Contents

|                               |    |
|-------------------------------|----|
| 1. <sup>1</sup> H NMR spectra | S2 |
| 2. DSC charts                 | S3 |
| 3. 2D GIWAXS patterns         | S3 |

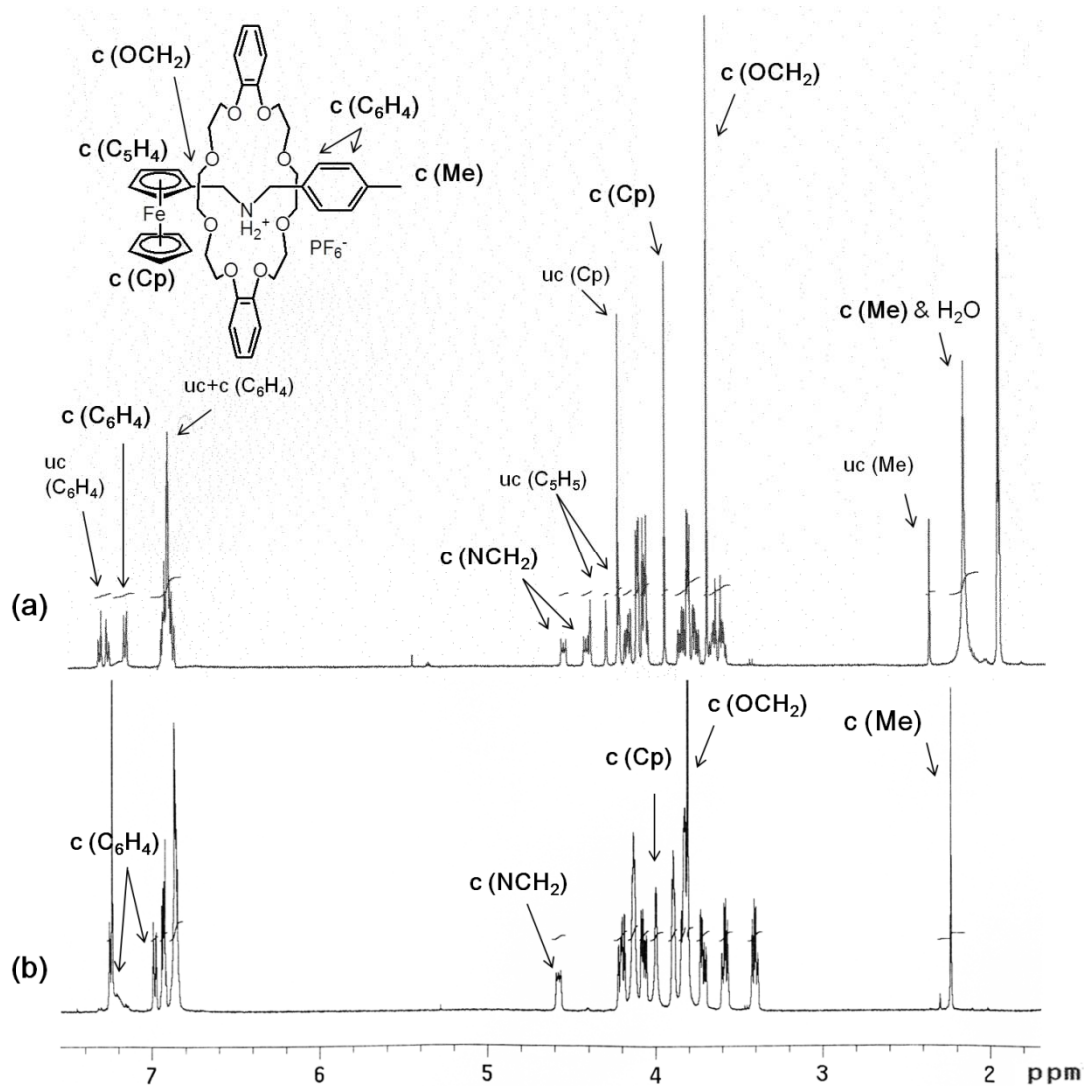

**Figure S1.**  $^1\text{H}$  NMR spectra (500 MHz) of  $[\text{F}\cdot\text{DB24C8}](\text{PF}_6)$  in (a)  $\text{CD}_3\text{CN}$  and (b)  $\text{CDCl}_3$ . Pseudorotaxane in an *d*-acetonitrile solution shows a mixture of complex and uncomplex. In contrast, pseudorotaxane in a *d*-chloroform solution exhibits high complex ratio.

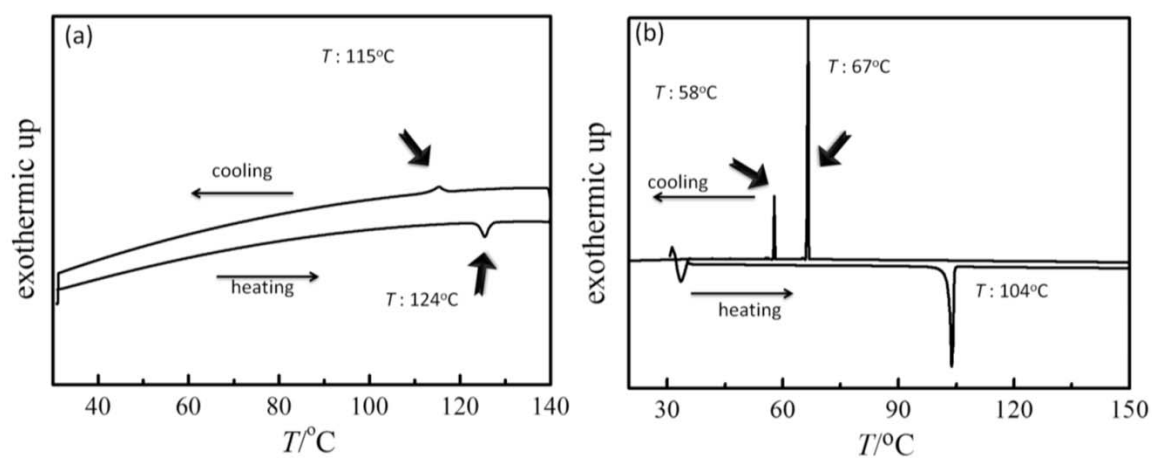

**Figure S2.** DSC heating and cooling scans of (a) the powder sample scratched from a solution cast-film and (b) DB24C8. Scan rate at  $5^\circ\text{C min}^{-1}$ .

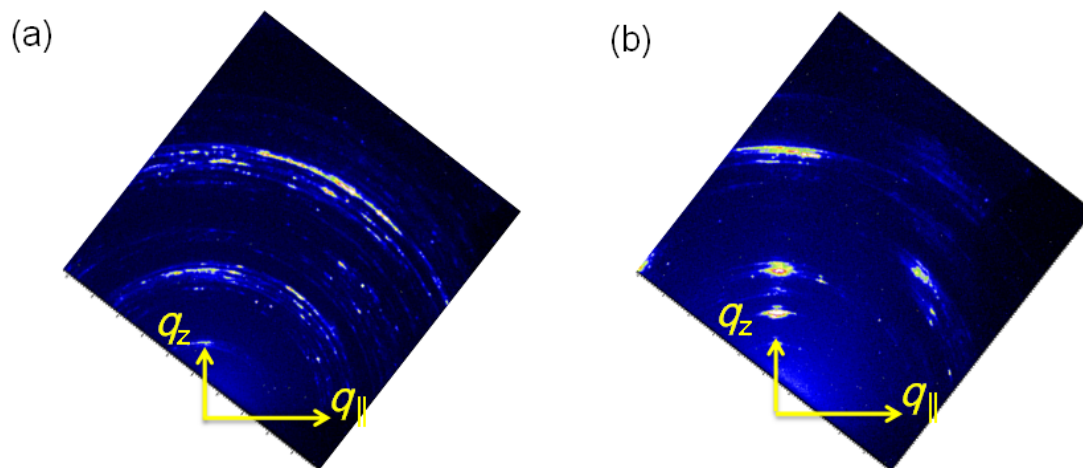

**Figure S3.** 2D GIWAXS patterns of (a) thicker film ( $6 \pm 1 \mu\text{m}$ ) and (b) thinner film ( $3 \pm 2 \mu\text{m}$ ) of  $[\text{F} \cdot \text{DB24C8}](\text{PF}_6)$ .
